# Supplementary material
Source: PubMed Central journal article supplement (PMC6505760)
Supplement: DS1_JVDI_10.1177_1040638718820082.pdf [file DS1_JVDI_10.1177_1040638718820082.pdf]

**Supplementary Table 1.** PCR assays used on isolates from working farm dogs and their home-killed raw meat diet in Manawatu, New Zealand.

| PCR assay                                                           | Primer sequences                                                                                                                                  | Target gene<br>(product size<br>in base pairs) | Amplification<br>conditions*      | Master mix content†                                                                                                                                                                                                                                             |
|---------------------------------------------------------------------|---------------------------------------------------------------------------------------------------------------------------------------------------|------------------------------------------------|-----------------------------------|-----------------------------------------------------------------------------------------------------------------------------------------------------------------------------------------------------------------------------------------------------------------|
| <i>Campylobacter</i><br>spp. <sup>4</sup>                           | C412F: 5'-GGATGACACTTTTCGGAGC-3'<br>C1228R‡: 5'-CATTGTAGCACGTGTGTC-3'                                                                             | 16S rDNA<br>(816)                              | 40 cycles<br>annealing at<br>56°C | 200 mM Tris-HCl and 1,000 mM KCl<br>(pH 8.3; 10× buffer), 100 μM each dNTP,<br>2.5 mM MgCl <sub>2</sub> , 4 pmol of each primer,<br>Platinum Taq (1 unit), ~40 ng sample<br>DNA, and distilled H <sub>2</sub> O (dH <sub>2</sub> O) to 20 μL<br>of total volume |
| <i>C. jejuni</i> <sup>6</sup> / <i>C. coli</i> <sup>1</sup>         | CJF: 5'-ACTTCTTTATTGCTTGCTGC-3'<br>CJR: 5'-GCCACAACAAGTAAAGAAGC-3'<br>COL3: 5'-AATTGAAAATTGCTCCAACATG-3'<br>MDCOL2: 5'-TGATTTTATTATTTGTAGCAGCG-3' | <i>hipO</i> (323)<br><i>ceuE</i> (462)         | 40 cycles<br>annealing at<br>55°C | 10× buffer, 100 μM each dNTP, 1.5 mM<br>MgCl <sub>2</sub> , 4 pmol of each primer, Platinum<br>Taq (1 unit), ~40 ng of sample DNA, and<br>distilled H <sub>2</sub> O to 20 μL of total volume                                                                   |
| <i>C. upsaliensis</i> / <i>C.</i><br><i>helveticus</i> <sup>4</sup> | CHCU146F: 5'-GGGACAACACTTAGAAATGAG-3'<br>CU1024R: 5'-CACTTCCGTATCTCTACAGA-3'<br>CH1371R: 5'-CCGTGACATGGCTGATTCAC-3'                               | 16S rDNA<br>(878/1,225 or<br>1,375)            | 35 cycles<br>annealing at<br>55°C | 10× buffer, 200 μM each dNTP, 1.5 mM<br>MgCl <sub>2</sub> , 4 pmol of each primer, Platinum<br>Taq (1 unit), ~40 ng of sample DNA,<br>distilled H <sub>2</sub> O to 20 μL of total volume                                                                       |
| <i>C. fetus</i> / <i>C.</i><br><i>hyointestinalis</i> <sup>4</sup>  | CFCH57F: 5'-GCAAGTCGAACGGAGTATTA-3'<br>CF1054R: 5'-GCAGCACCTGTCTCAACT-3'<br>CH1344R: 5'-GCGATTCCGGCTTCATGCTC-3'                                   | 16S rDNA<br>(997/1,287)                        | 35 cycles<br>annealing at<br>55°C | 10× buffer, 200 μM each dNTP, 1.5 mM<br>MgCl <sub>2</sub> , 4 pmol of each primer, Platinum<br>Taq (1 unit), ~40 ng of sample DNA, and<br>distilled H <sub>2</sub> O to 20 μL of total volume                                                                   |
| <i>C. lari</i> <sup>4</sup>                                         | CL594F: 5'-CAAGTCTCTTGTGAAATCCAAC-3'<br>CL1155R: 5'-ATTTAGAGTGCTCACCCGAAG-3'                                                                      | 16S rDNA<br>(561)                              | 35 cycles<br>annealing at<br>55°C | 10× buffer, 200 μM each dNTP, 1.5 mM<br>MgCl <sub>2</sub> , 4 pmol of each primer, Platinum<br>Taq (1 unit), ~40 ng of sample DNA, and<br>distilled H <sub>2</sub> O to 20 μL of total volume                                                                   |
| <i>Arcobacter</i><br><i>butzleri</i> <sup>2</sup>                   | AB959F: 5'-CCTGGACTTGACATAGTAAGAATGA-3'<br>AB1338R: 5'-CGTATTCACCGTAGCATAGC-3'                                                                    | 16S rDNA<br>(401)                              | 35 cycles<br>annealing at<br>61°C | 10× buffer, 200 μM each dNTP, 1.5 mM<br>MgCl <sub>2</sub> , 4 pmol of each primer, Platinum<br>Taq (1 unit), ~40 ng of sample DNA, and<br>distilled H <sub>2</sub> O to 20 μL of total volume                                                                   |

|                       |                                                                     |                     |                                     |                                                                                                                                                                                      |
|-----------------------|---------------------------------------------------------------------|---------------------|-------------------------------------|--------------------------------------------------------------------------------------------------------------------------------------------------------------------------------------|
| 16S rDNA <sup>5</sup> | 27F: 5'-AGAGTTTGATCMTGGCTCAG-3'<br>1492R: 5'-GGTTACCTTGTTACGACTT-3' | 16S rDNA<br>(1,465) | 30 cycles<br>annealing at<br>58.5°C | 10× buffer, 100 μM each dNTP, 1.5 mM MgCl <sub>2</sub> , 4 pmol of each primer, Platinum Taq (1 unit), ~40 ng of sample DNA, and distilled H <sub>2</sub> O to 20 μL of total volume |
|-----------------------|---------------------------------------------------------------------|---------------------|-------------------------------------|--------------------------------------------------------------------------------------------------------------------------------------------------------------------------------------|

\* All PCR assays had initial denaturation at 96°C and final extension at 72°C for 2 min each. All amplification cycle steps were 30 s, and all elongation and extension steps were at 96°C and 72°C, respectively. Some of the assay parameters (annealing temperature and concentrations of dNTP, primers, and magnesium chloride) have been modified from the original publications as a result of in-house optimization procedures that involved validation with one target and one non-target strain.

† All master mix components and 1 Kb Plus marker ladder sourced from Invitrogen (Carlsbad, CA) except for in-house prepared distilled water. All PCR assays included distilled H<sub>2</sub>O as a negative control and a sample DNA of target bacterial species (*C. jejuni* NCTC 11168, *C. coli* NCTC 11366, *C. upsaliensis* NCTC 11541, *C. helveticus* CCUG 30682, *C. fetus* NCTC 10842, *C. hyointestinalis* NCTC 11608, *C. lari* NCTC 11352, and *A. butzleri* NCTC 12481 as appropriate for the PCR assay) as a positive control.

‡ Inglis and Kalischuk<sup>3</sup> reported a typographical error in the paper by Linton et al. (1996)<sup>4</sup>: primer C1288R should read C1228R.

### References

1. Denis M, et al. Development of a m-PCR assay for simultaneous identification of *Campylobacter jejuni* and *C. coli*. Lett Appl Microbiol 1999;29:406–410.
2. Houf K, et al. Development of a multiplex PCR assay for the simultaneous detection and identification of *Arcobacter butzleri*, *Arcobacter cryaerophilus* and *Arcobacter skirrowii*. FEMS Microbiol Lett 2000;193:89–94.

3. Inglis GD, Kalischuk LD. Use of PCR for direct detection of *Campylobacter* species in bovine feces. *Appl Environ Microbiol* 2003;69:3435–3447.
4. Linton D, et al. Rapid identification by PCR of the genus *Campylobacter* and of five *Campylobacter* species enteropathogenic for man and animals. *Res Microbiol* 1996;147:707–718.
5. Suzuki MT, Giovannoni SJ. Bias caused by template annealing in the amplification of mixtures of 16S rRNA genes by PCR. *Appl Environ Microbiol* 1996;62:625–630.
6. Wang G, et al. Colony multiplex PCR assay for identification and differentiation of *Campylobacter jejuni*, *C. coli*, *C. lari*, *C. upsaliensis*, and *C. fetus* subsp. *fetus*. *J Clin Microbiol* 2002;40:4744–4747.
